# Supplementary material for: Influence of the terminal donor on the performance of 4,8-dialkoxybenzo[1,2-b:4,5′]dithiophene based small molecules for efficient solution-processed organic solar cells
Source: Royal Society of Chemistry journal article supplement (doi:10.1039/c5nj02529j), 2015-12-16
Supplement: c5nj02529j1.pdf [file c5nj02529j1.pdf]

## Supporting Information

### **Influence of Terminal Donor on the Performance of 4, 8-Dialkoxybenzo[1,2-*b*:4,5']dithiophene based Small Molecule for Efficient Solution-processed Organic Solar Cells**

Sushil.S. Bagde,<sup>a</sup> Hanok Park<sup>a</sup>, Song-Mi Lee<sup>a</sup> and Soo-Hyoung Lee<sup>a, \*</sup>

School of Semiconductor and Chemical Engineering, Chonbuk National University, Duckjin-  
dong 664-14, Jeonju 561- 756, Republic of Korea

\*Corresponding author; Telephone: +063-270-2435, Fax: +063-270-2306,

E-mail: [shlee66@jbnu.ac.kr](mailto:shlee66@jbnu.ac.kr)

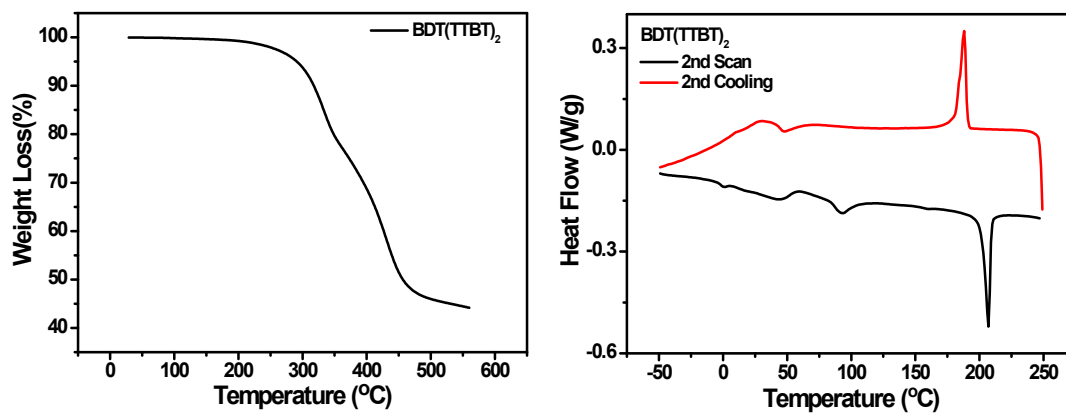

Fig. S1 TGA and DSC of BDT(TTBT)<sub>2</sub>

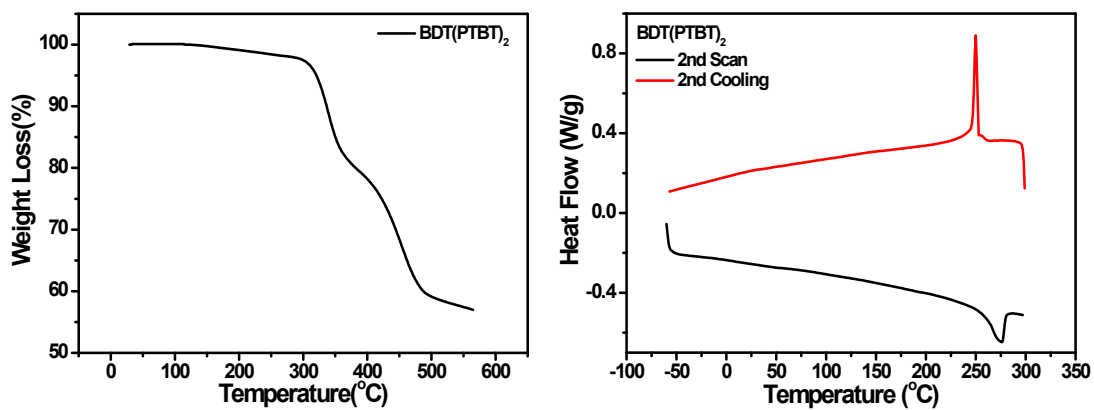

Fig. S2 TGA and DSC of BDT(PTBT)<sub>2</sub>

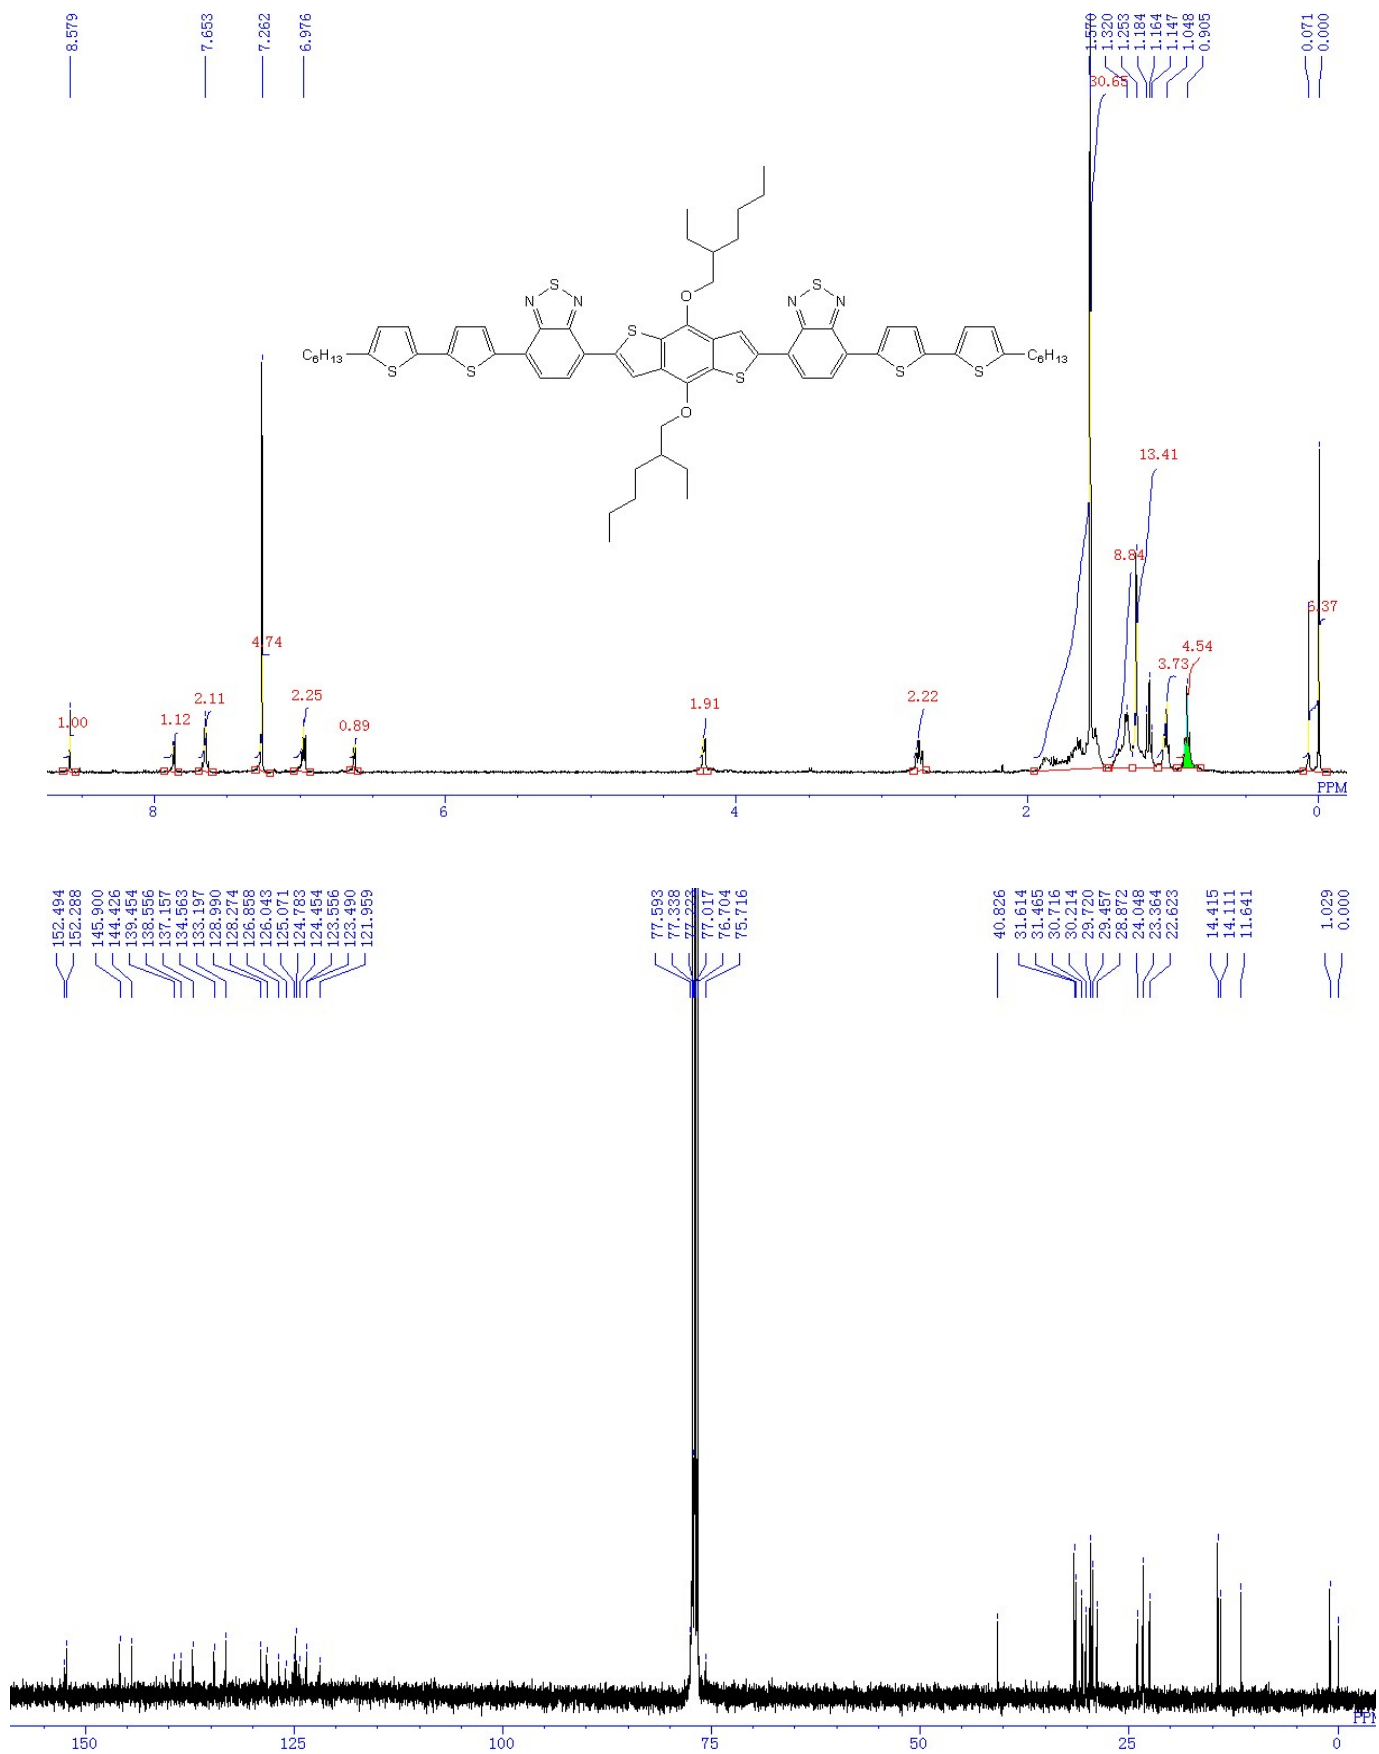

Fig. S3 <sup>1</sup>H & <sup>13</sup>C NMR of BDT(TTBT)<sub>2</sub>

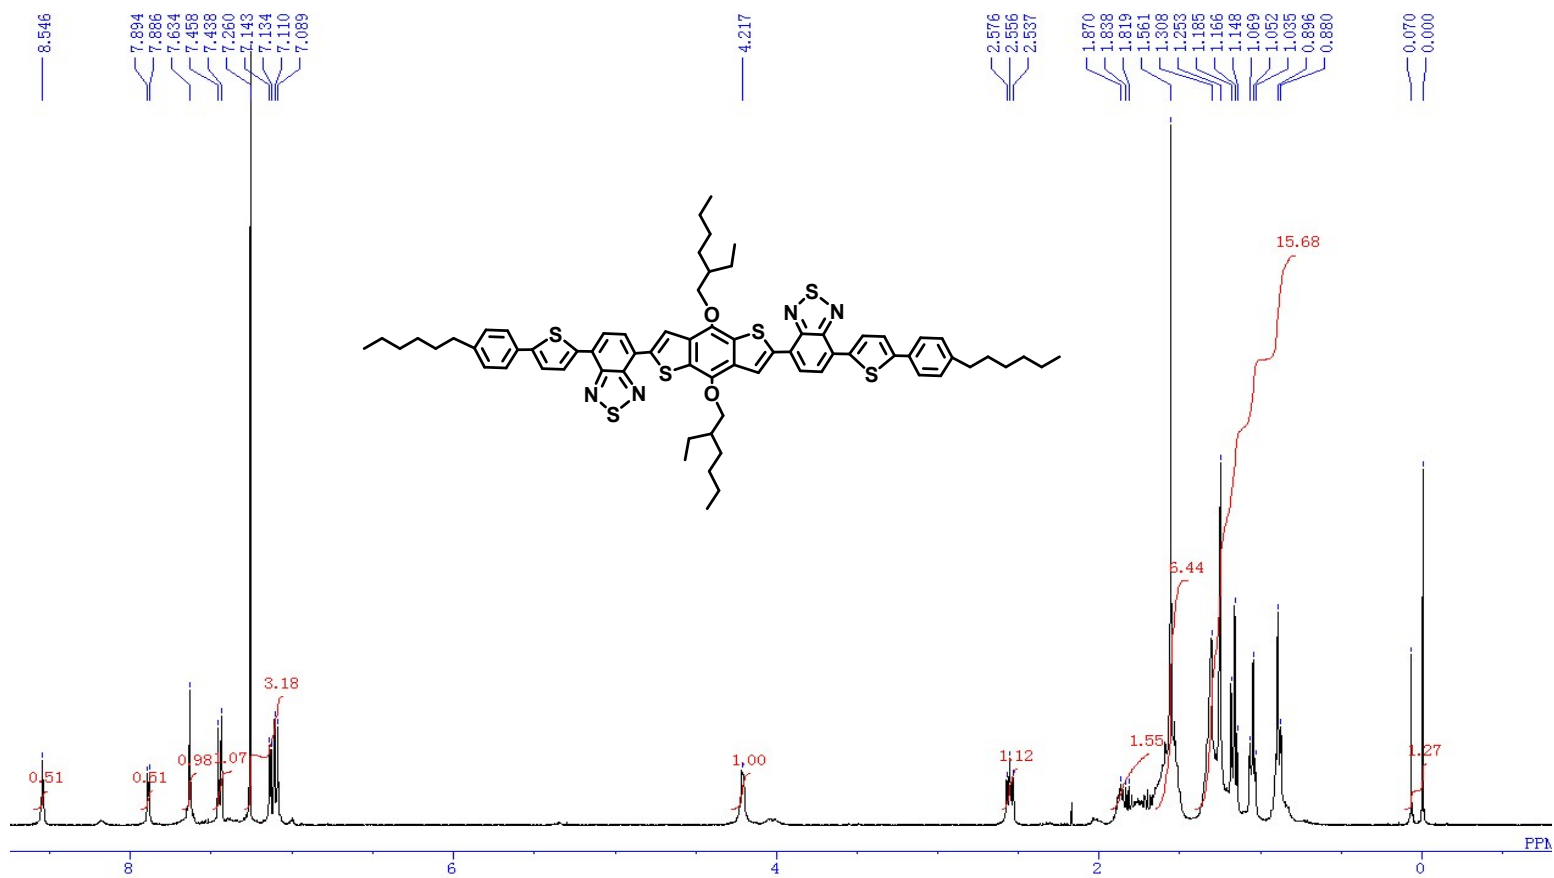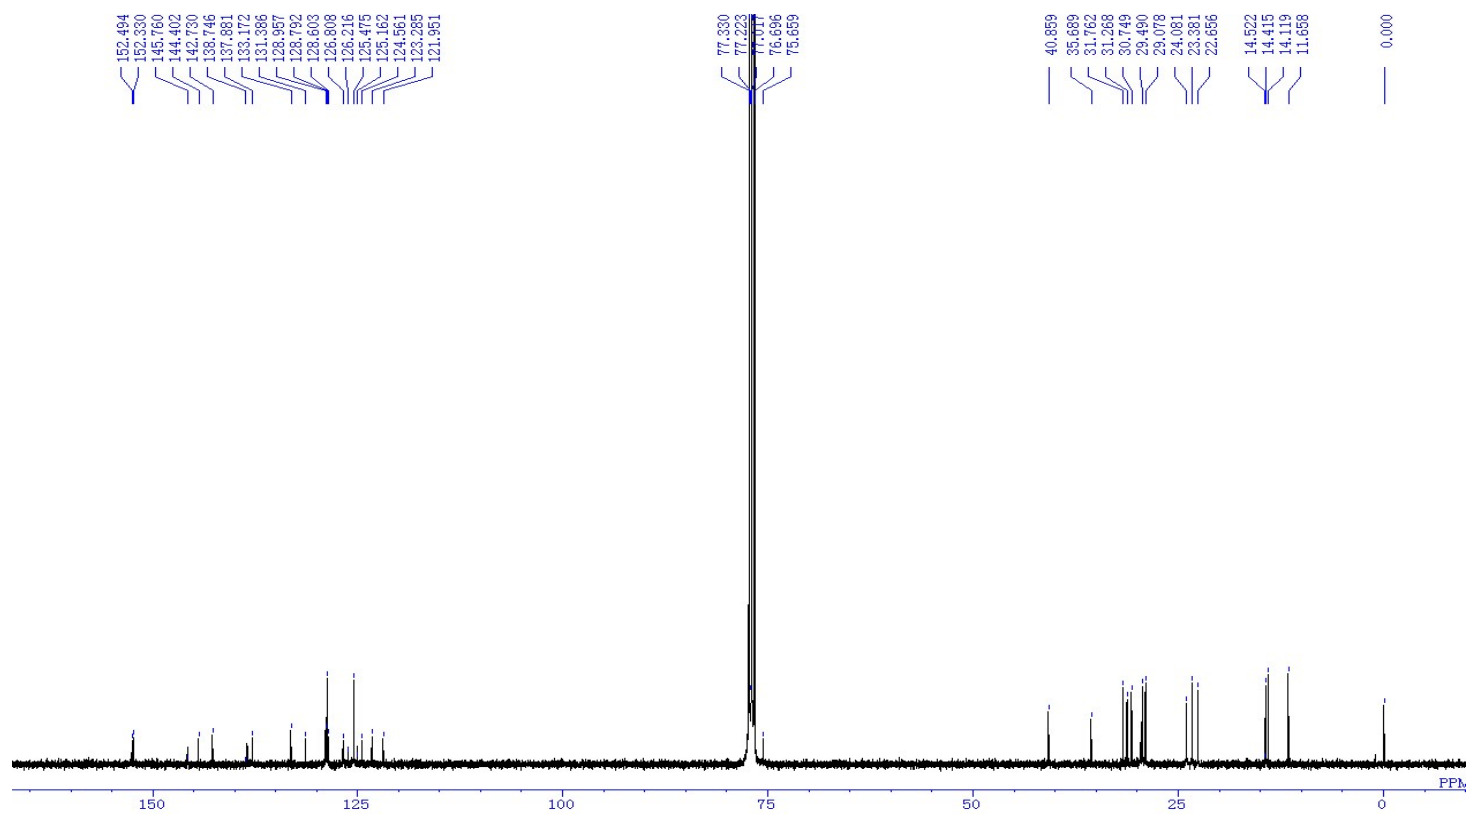

Fig. S4 <sup>1</sup>H & <sup>13</sup>C NMR of BDT(PTBT)<sub>2</sub>

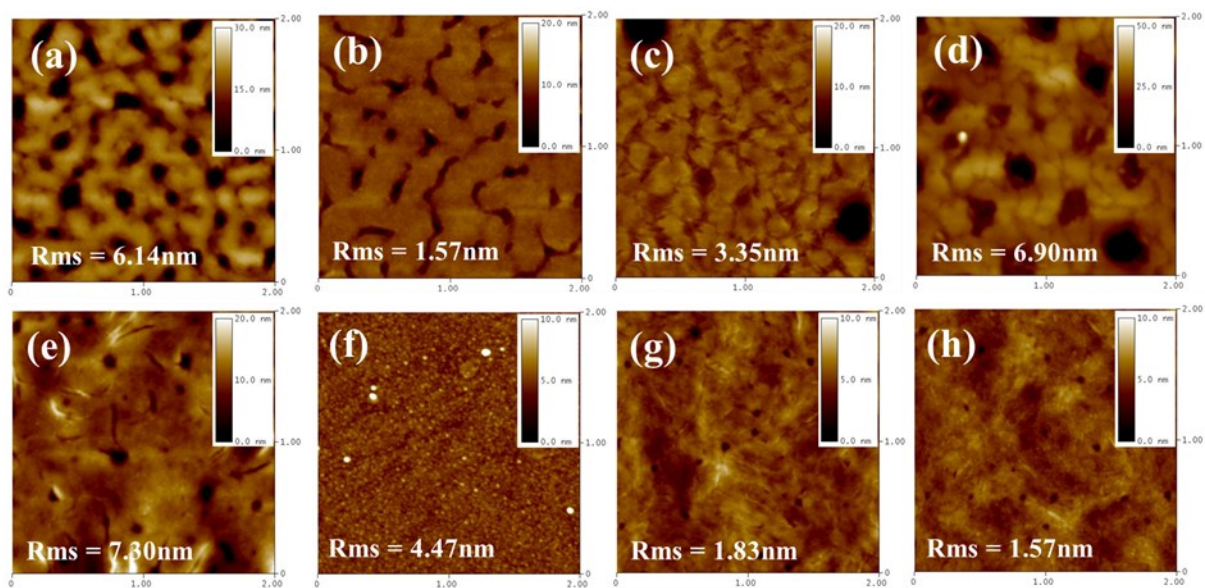

**Fig. S5** The AFM images of (a-d) BDT(TTBT)<sub>2</sub>:PC<sub>71</sub>BM and (e-h) BDT(PTBT)<sub>2</sub>:PC<sub>71</sub>BM films with different blend ratio : (a, e) 1:1, (b, f) 1:2, (c, g) 1:3, (d, h) 1:4 without post annealing.
